# Supplementary material
Source: PubMed Central journal article supplement (PMC5860021)
Supplement: kwx167rebholzwebmaterialfinal.pdf [file kwx167rebholzwebmaterialfinal.pdf]

Web Material

Web Table 1. Baseline Characteristics of the Study Population According to Categories of 1,5-Anhydroglucitol (1,5-AG) and Diabetes Status at Baseline, Atherosclerosis Risk in Communities Study, 1990-1992<sup>a</sup>

| Characteristic               | Total population<br>(N=13,277) | No Diagnosed Diabetes     |                        | Diagnosed Diabetes     |                          |                       | <i>P</i> -value –<br>all categories <sup>b</sup> | <i>P</i> -value –<br>no diabetes <sup>c</sup> | <i>P</i> -value –<br>diabetes <sup>d</sup> |
|------------------------------|--------------------------------|---------------------------|------------------------|------------------------|--------------------------|-----------------------|--------------------------------------------------|-----------------------------------------------|--------------------------------------------|
|                              |                                | 1,5-AG                    | 1,5-AG                 | 1,5-AG                 | 1,5-AG                   | 1,5-AG                |                                                  |                                               |                                            |
|                              |                                | ≥10.0 µg/mL<br>(n=11,250) | <10.0 µg/mL<br>(n=783) | ≥10.0 µg/mL<br>(n=421) | 6.0-9.9 µg/mL<br>(n=162) | <6.0 µg/mL<br>(n=661) |                                                  |                                               |                                            |
| 1,5-AG, µg/mL <sup>e</sup>   | 18.1 (14.0, 22.0)              | 19.1 (15.8, 22.6)         | 7.4 (5.3, 8.8)         | 16.2 (13.1, 20.2)      | 8.1 (7.2, 9.0)           | 1.9 (1.3, 3.3)        | <0.001                                           | <0.001                                        | <0.001                                     |
| Fasting glucose, mg/dL       | 112.2 (38.3)                   | 103.5 (12.6)              | 127.0 (55.3)           | 132.0 (33.8)           | 163.7 (43.4)             | 246.8 (76.5)          | <0.001                                           | <0.001                                        | <0.001                                     |
| HbA1c, %                     | 5.8 (1.2)                      | 5.5 (0.5)                 | 6.2 (1.6)              | 6.3 (0.9)              | 7.3 (1.0)                | 9.9 (1.9)             | <0.001                                           | <0.001                                        | <0.001                                     |
| Fructosamine, µmol/L         | 239.1 (50.2)                   | 227.6 (19.9)              | 253.6 (63.5)           | 251.5 (35.2)           | 286.9 (40.5)             | 399.6 (94.7)          | <0.001                                           | <0.001                                        | <0.001                                     |
| Glycated albumin, %          | 0.5 (0.2)                      | 0.5 (0.1)                 | 0.6 (0.2)              | 0.5 (0.1)              | 0.7 (0.2)                | 1.1 (0.4)             | <0.001                                           | <0.001                                        | <0.001                                     |
| Age, years                   | 56.9 (5.7)                     | 56.7 (5.7)                | 57.5 (6.0)             | 58.4 (5.8)             | 59.6 (5.2)               | 58.0 (5.7)            | <0.001                                           | <0.001                                        | 0.2                                        |
| Male sex                     | 43.9% (5,830)                  | 44.4% (4,989)             | 39.5% (309)            | 44.4% (187)            | 44.4% (72)               | 41.3% (273)           | 0.06                                             | 0.008                                         | 0.5                                        |
| Black race                   | 24.4% (3,244)                  | 21.8% (2,455)             | 30.5% (239)            | 39.0% (164)            | 39.5% (64)               | 48.7% (322)           | <0.001                                           | <0.001                                        | 0.003                                      |
| Body mass index <sup>f</sup> | 28.0 (5.4)                     | 27.6 (5.2)                | 28.3 (5.6)             | 30.3 (5.9)             | 31.2 (6.0)               | 31.3 (6.1)            | <0.001                                           | 0.001                                         | 0.01                                       |
| Current smoking              | 22.1% (2,925)                  | 22.7% (2,545)             | 18.3% (143)            | 23.6% (99)             | 17.9% (29)               | 16.5% (109)           | <0.001                                           | 0.005                                         | 0.01                                       |

|                                   |               |               |             |             |             |             |        |        |       |
|-----------------------------------|---------------|---------------|-------------|-------------|-------------|-------------|--------|--------|-------|
| Hypertension                      | 35.6% (4,717) | 32.8% (3,680) | 37.7% (295) | 59.0% (247) | 64.2% (104) | 59.5% (391) | <0.001 | 0.005  | 0.5   |
| eGFR <sub>Cr-Cys</sub> category   |               |               |             |             |             |             | <0.001 | <0.001 | 0.03  |
| <60 mL/min/1.73 m <sup>2</sup>    | 2.8% (370)    | 2.1% (230)    | 3.9% (30)   | 8.4% (35)   | 10.1% (16)  | 9.0% (59)   |        |        |       |
| 60-89 mL/min/1.73 m <sup>2</sup>  | 31.9% (4,207) | 32.2% (3,602) | 29.0% (226) | 35.0% (146) | 32.1% (51)  | 27.8% (182) |        |        |       |
| 90-134 mL/min/1.73 m <sup>2</sup> | 64.8% (8,547) | 65.4% (7,311) | 66.0% (514) | 56.4% (235) | 56.6% (90)  | 60.7% (397) |        |        |       |
| ≥135 mL/min/1.73 m <sup>2</sup>   | 0.5% (66)     | 0.3% (38)     | 1.2% (9)    | 0.2% (1)    | 1.3% (2)    | 2.5% (16)   |        |        |       |
| eGFR <sub>β2M</sub> category      |               |               |             |             |             |             | <0.001 | 0.006  | 0.003 |
| <60 mL/min/1.73 m <sup>2</sup>    | 7.7% (1,026)  | 6.8% (761)    | 8.9% (70)   | 15.7% (66)  | 17.9% (29)  | 15.1% (100) |        |        |       |
| 60-89 mL/min/1.73 m <sup>2</sup>  | 70.7% (9,387) | 72.0% (8,104) | 66.5% (521) | 66.3% (279) | 64.8% (105) | 57.2% (378) |        |        |       |
| 90-134 mL/min/1.73 m <sup>2</sup> | 21.5% (2,856) | 21.1% (2,378) | 24.5% (192) | 17.8% (75)  | 17.3% (28)  | 27.7% (183) |        |        |       |
| ≥135 mL/min/1.73 m <sup>2</sup>   | 0.1% (7)      | 0.1% (6)      | 0% (0)      | 0.2% (1)    | 0% (0)      | 0% (0)      |        |        |       |

1,5-AG, 1,5-anhydroglucitol; eGFR<sub>Cr-Cys</sub>, estimated glomerular filtration rate based on creatinine and cystatin C; eGFR<sub>β2M</sub>, estimated glomerular filtration rate based on β<sub>2</sub>-microglobulin; HbA1c, hemoglobin A1c

Conversion factor for glucose in mg/dL to mmol/L, x 0.05551.

<sup>a</sup> Mean (standard deviation) for continuous variables and % (n) for categorical variables unless otherwise stated

<sup>b</sup> *P*-value for linear trend across all five 1,5-AG categories from linear regression for continuous variables and  $\chi^2$  test for categorical variables

<sup>c</sup> *P*-value for difference between two 1,5-AG categories (≥10.0 μg/mL vs. <10.0 μg/mL) among those with no diagnosed diabetes from *t* test for continuous variables and  $\chi^2$  test for categorical variables

<sup>d</sup> *P*-value for linear trend across three 1,5-AG categories ( $\geq 10.0$   $\mu\text{g/mL}$ , 6.0-9.9  $\mu\text{g/mL}$ , vs.  $< 6.0$   $\mu\text{g/mL}$ ) among those with diabetes from linear regression for continuous variables and  $\chi^2$  test for categorical variables

<sup>e</sup> Median (25<sup>th</sup> percentile, 75<sup>th</sup> percentile)

<sup>f</sup> Body mass index was calculated as weight (kg)/ height (m)<sup>2</sup>.
